# Supplementary material for: A porphyrin metal–organic framework enhances photodynamic therapy through lymphatic circulation
Source: Royal Society of Chemistry journal article supplement (doi:10.1039/d4tb02199a), 2025-01-01
Supplement: d4tb02199a1.pdf [file d4tb02199a1.pdf]

## Supporting Information

### **Porphyrin metal-organic framework enhances photodynamic therapy through lymphatic circulation**

*QiuHong Ouyang,<sup>‡a</sup> Xin Li,<sup>‡a</sup> Yuechen He,<sup>a</sup> Yuxin Bai,<sup>a</sup> Xunhuan Song,<sup>a</sup> Xinglv Chen,<sup>a</sup> Yuzhou Xiao,<sup>a</sup> Lili Mao,<sup>b</sup> Min Chen,<sup>a</sup> Xiaodan Pan,<sup>a</sup> Weihong Kuang,<sup>a</sup> Feng Qin,<sup>\*a</sup> Meng Qin<sup>\*a</sup> and Xiaoi Wu<sup>\*a</sup>*

<sup>a</sup> Department of Nuclear Medicine, Mental Health Center and Center for Preclinical Safety Evaluation of Drugs, State Key Laboratory of Biotherapy/Collaborative Innovation Center for Biotherapy, West China Hospital, Sichuan University, Chengdu 610041, China.

<sup>b</sup> Key laboratory of Carcinogenesis and Translational Research (Ministry of Education/Beijing), Department of Melanoma and Sarcoma, Peking University Cancer Hospital and Institute, Beijing 100142, China.

<sup>‡</sup>These authors contributed to the work equally.

<sup>\*</sup> Corresponding authors.

E-mail: qinfeng@scu.edu.cn, qinmeng212@scu.edu.cn, xiaoai.wu@scu.edu.cn

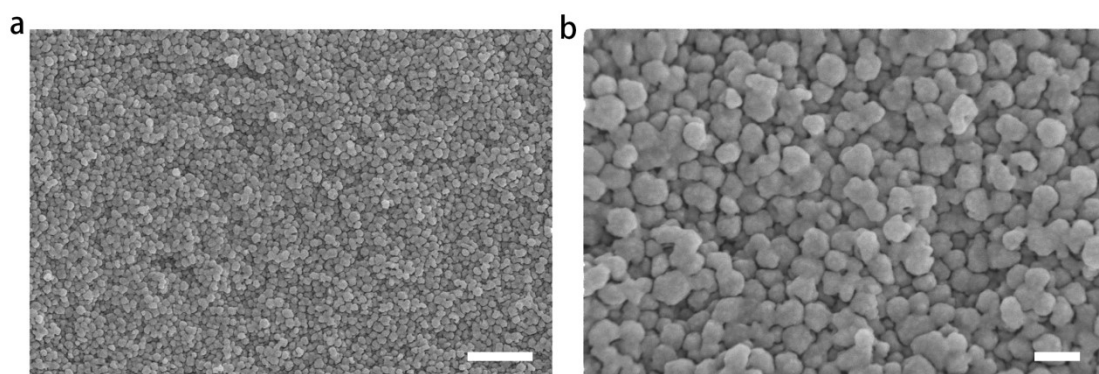

**Figure S1.** TEM image (a) and enlarged-TEM image (b) of MOF. Scale bars are 1  $\mu\text{m}$  (left) and 200 nm (right).

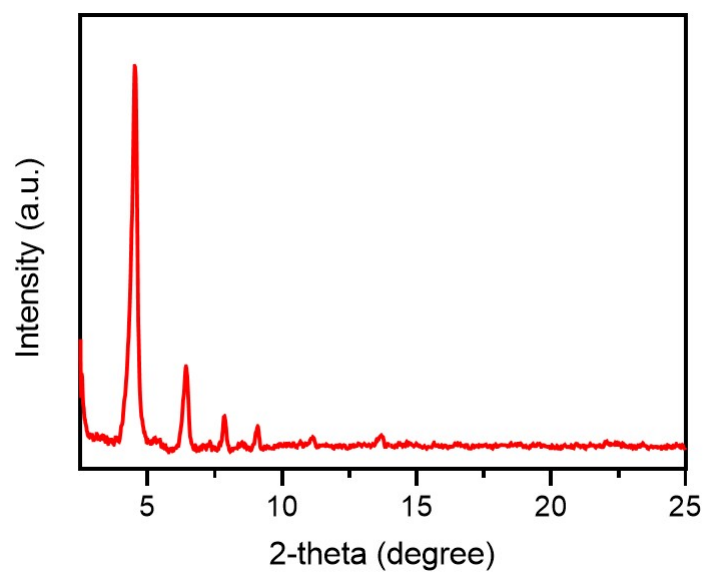

**Figure S2.** XRD pattern of MOFs.

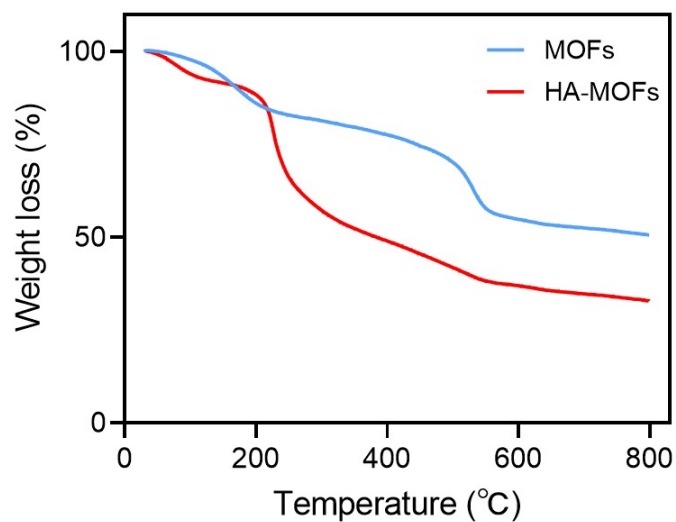

**Figure S3.** TG analysis of MOFs and HA-MOFs.

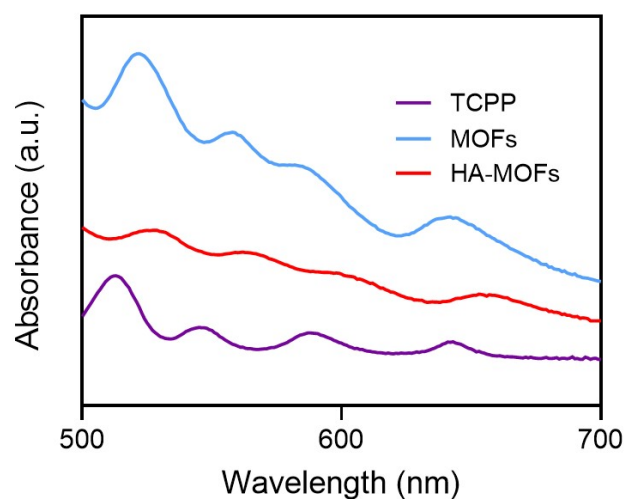

**Figure S4.** UV-vis spectra of TCPP, MOFs and HA-MOFs in the 500-700 nm range.

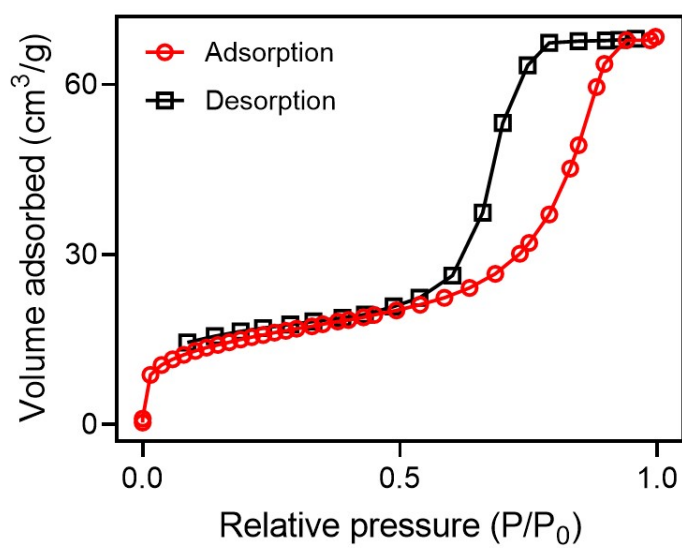

**Figure S5.** N<sub>2</sub> adsorption-desorption isotherms of MOFs.

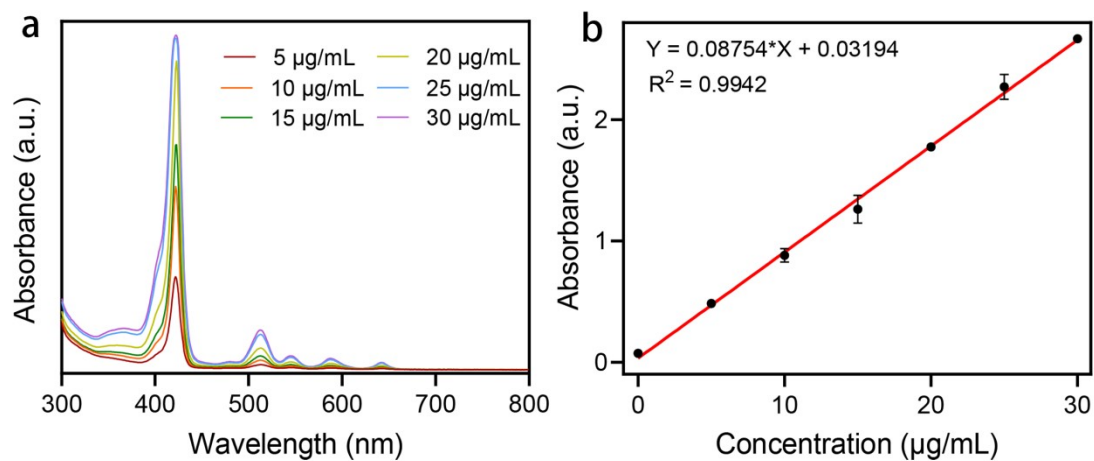

**Figure S6.** Concentration-dependent UV-Vis absorption spectrum of TCPP (a). Standard curve based on absorbance at 416 nm and TCPP concentration (b).

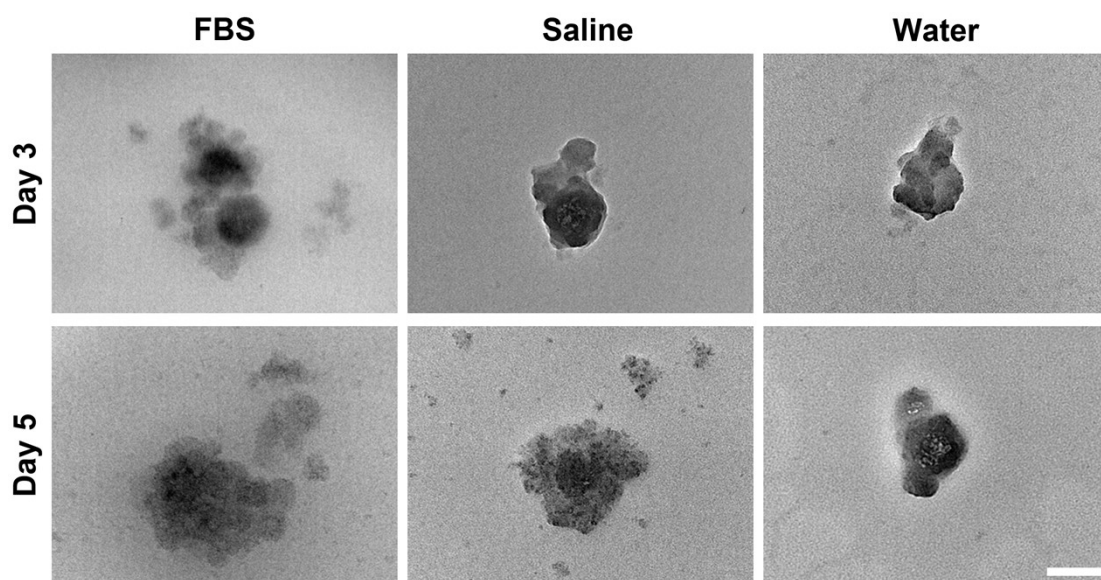

**Figure S7.** TEM images of HA-MOFs on days 3 and 5 in different media. Scale bar is 100 nm.

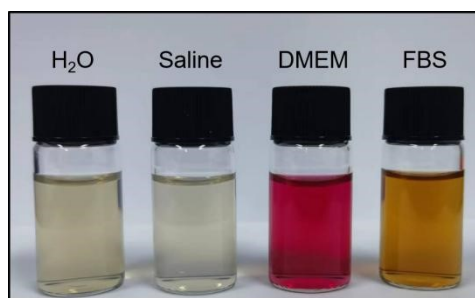

20  $\mu\text{g mL}^{-1}$

**Figure S8.** Photograph of HA-MOFs dissolved in different solutions.

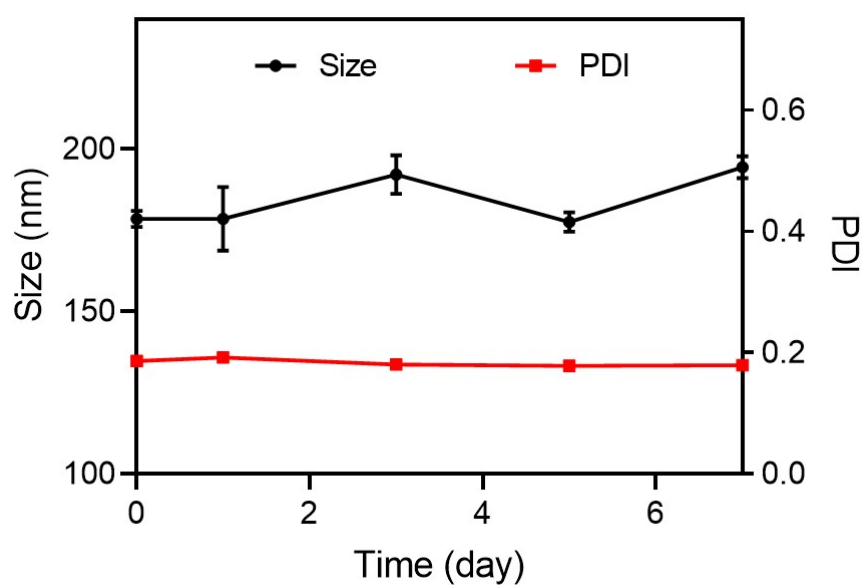

**Figure S9.** The hydrodynamic size and PDI value of HA-MOFs during storage in PBS buffer for different days.

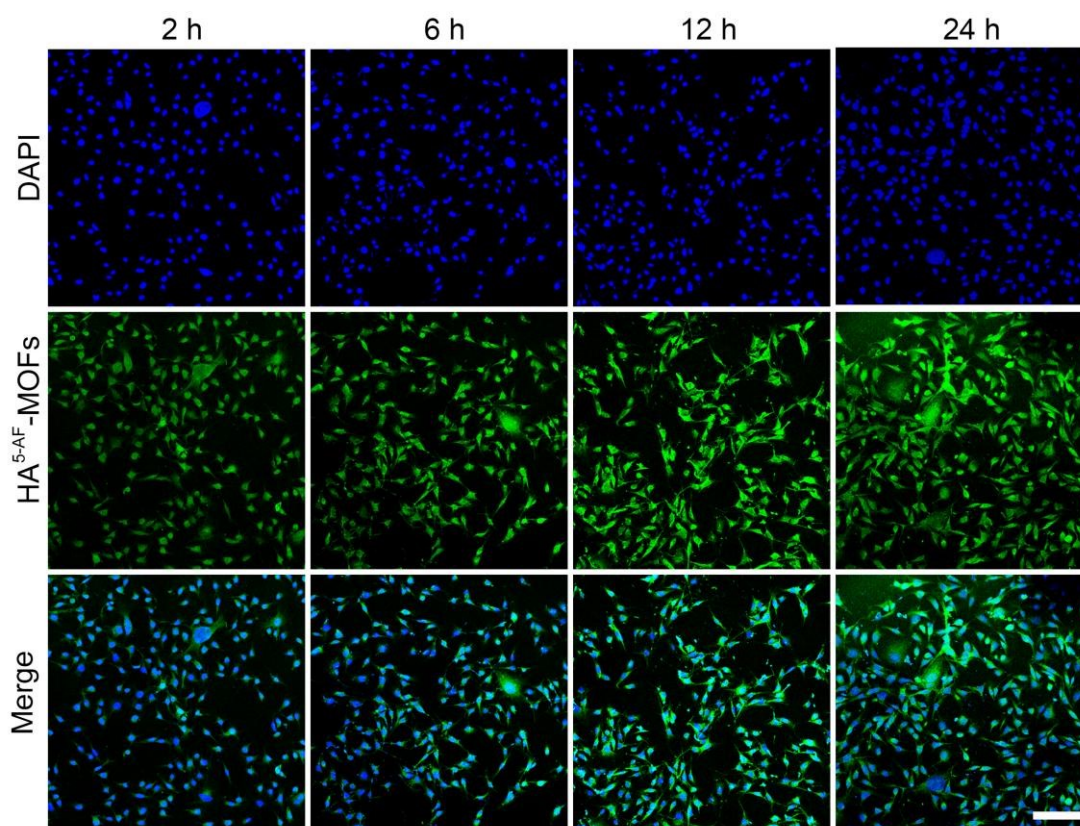

**Figure S10.** Fluorescence images of B16F10 cells incubated with of HA<sup>5-AF</sup>-MOFs at different time points. Scale bar is 100  $\mu$ m.



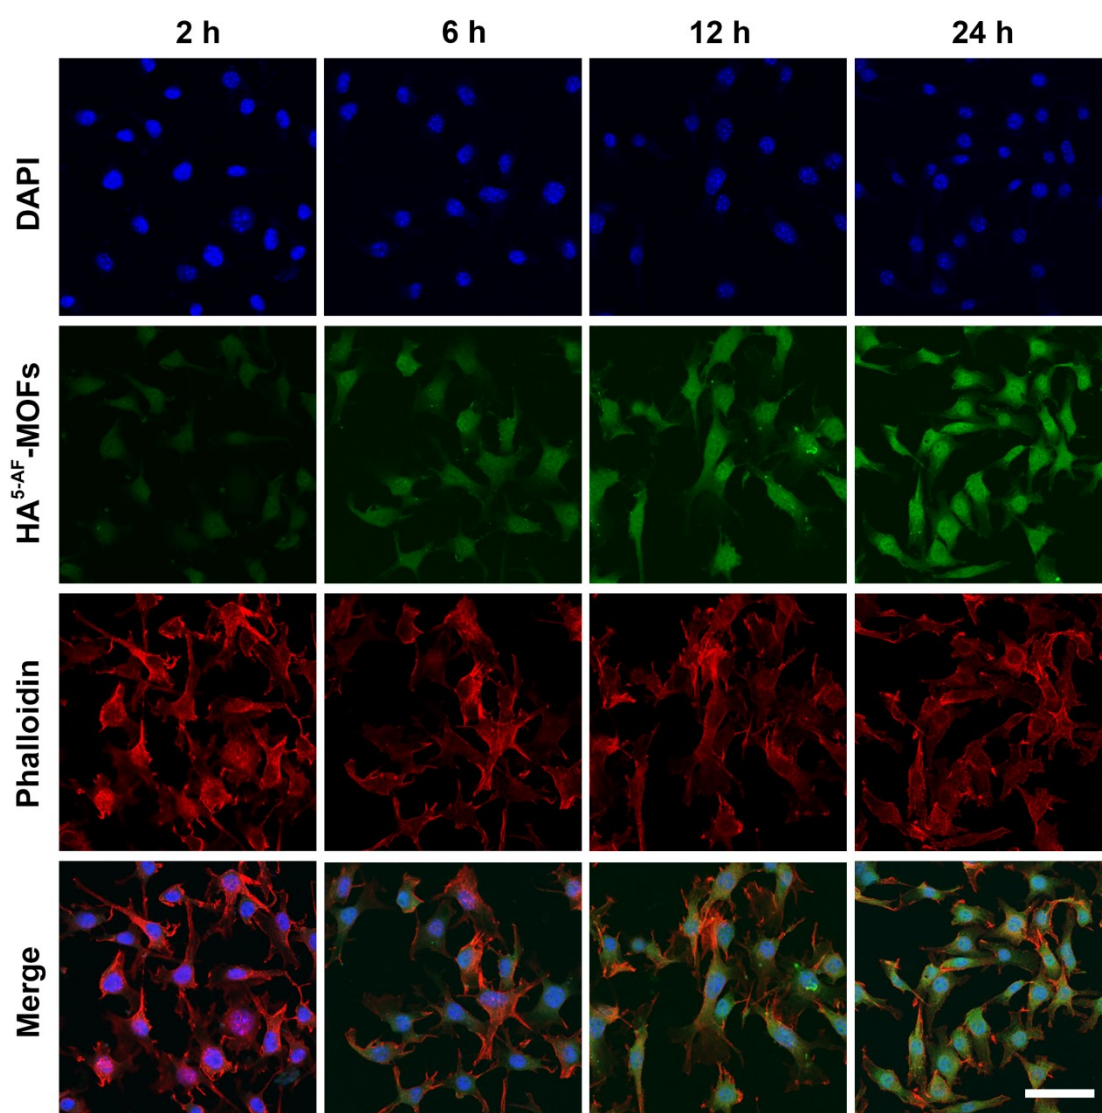

**Figure S11.** Fluorescence localization images of HA<sup>5-AF</sup>-MOF in B16F10 cells at different time points. Scale bar is 50  $\mu$ m.

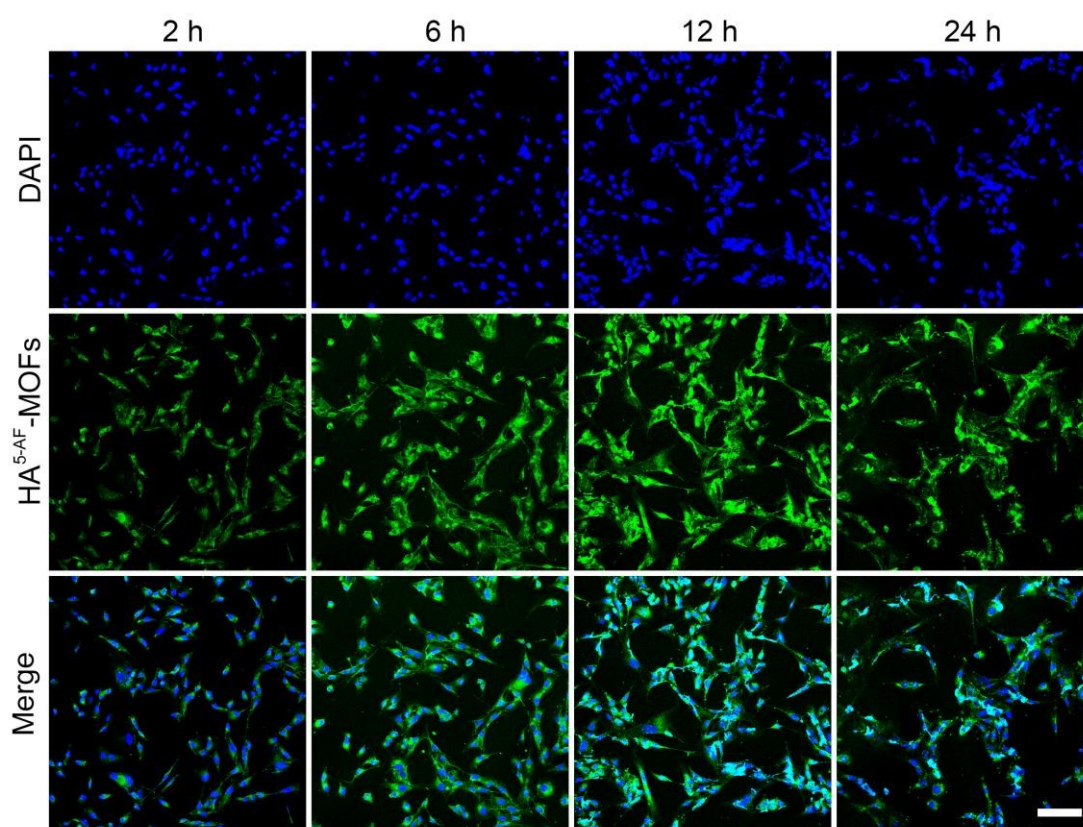

**Figure S12.** Fluorescence images of H1975 cells incubated with of HA<sup>5-AF</sup>-MOFs at different time points. Scale bar is 100  $\mu\text{m}$ .

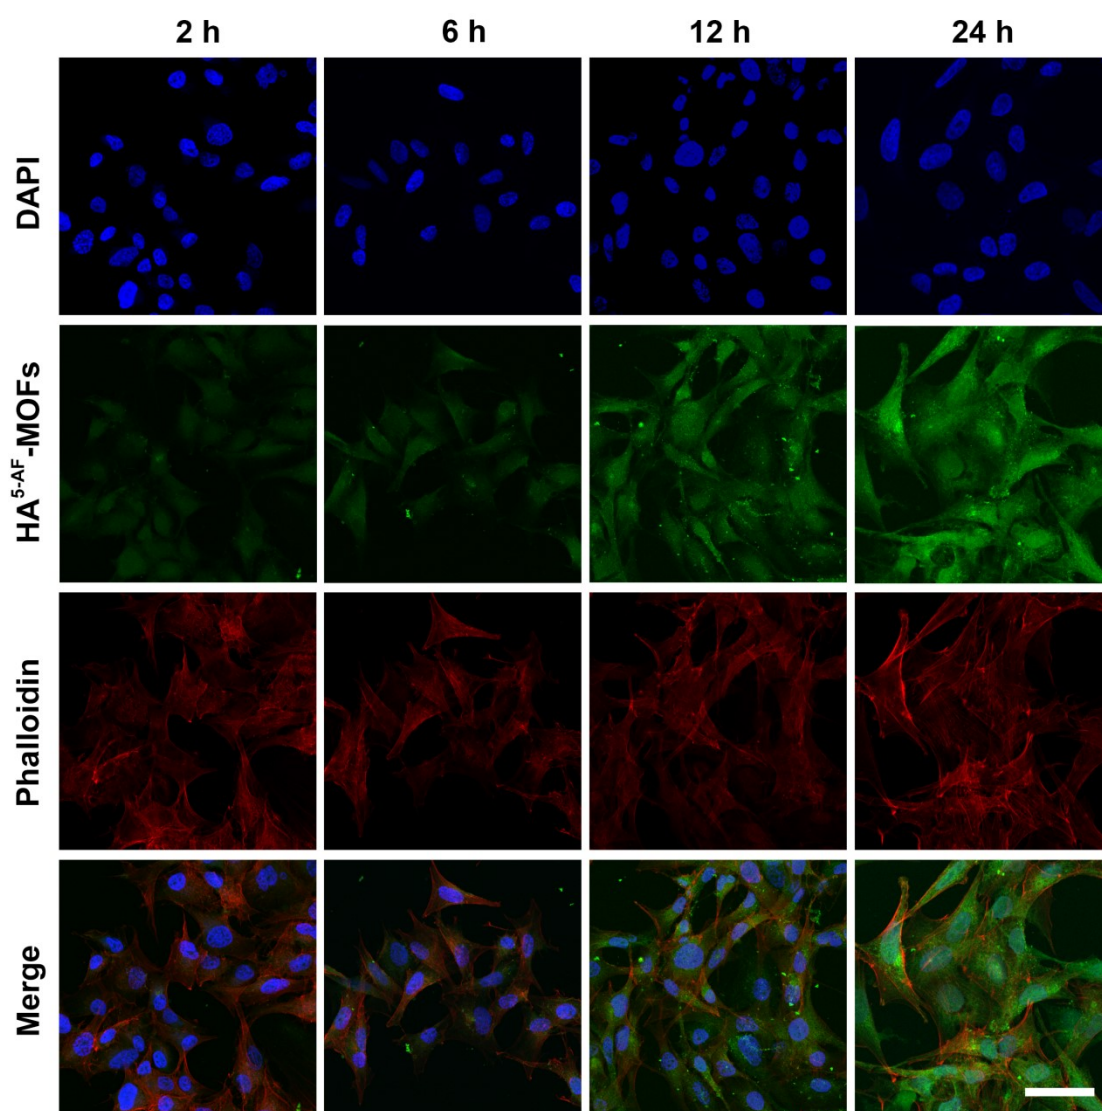

**Figure S13.** Fluorescence localization images of HA<sup>5-AF</sup>-MOF in H1975 cells at different time points. Scale bar is 50  $\mu$ m.

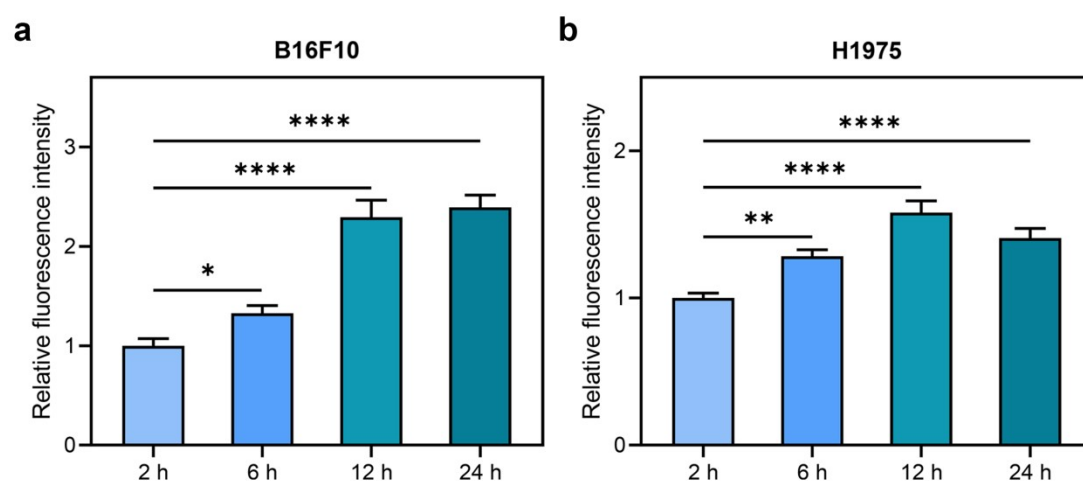

**Figure S14.** Fluorescence intensity quantification of HA<sup>5-AF</sup>-MOFs uptake by (a) B16F10 and (b) H1975 cells.



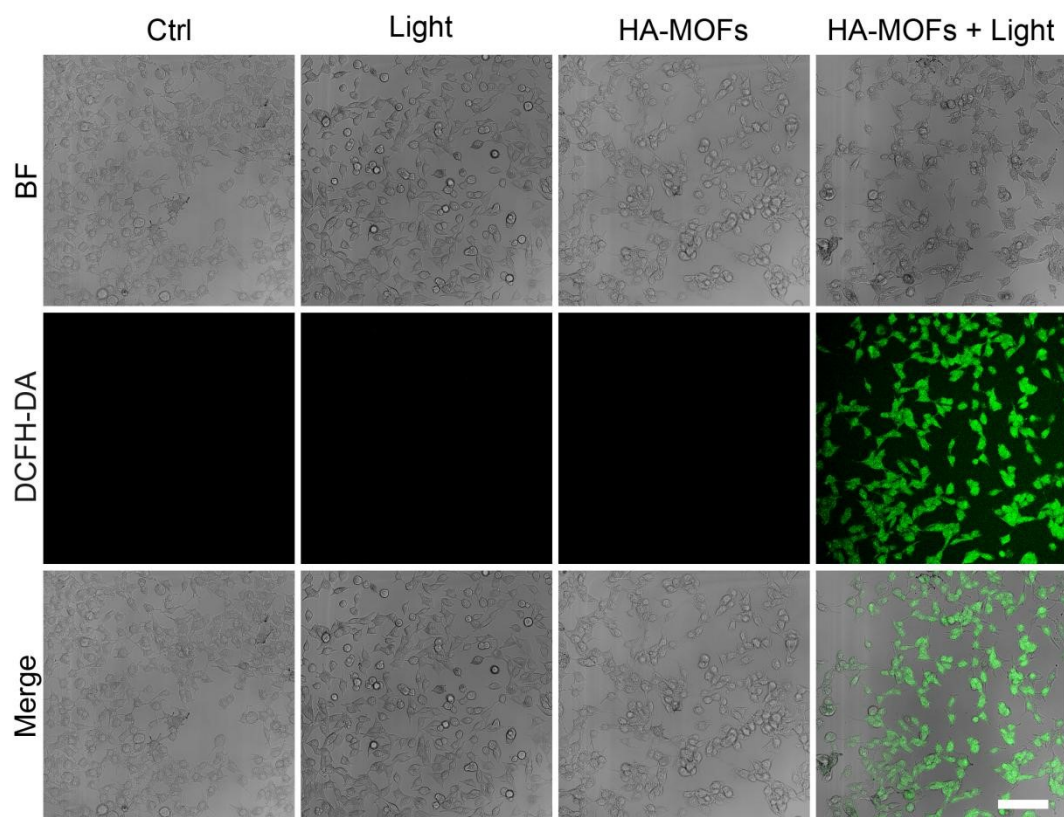

**Figure S15.** Cellular images of light-induced ROS generation in B16F10 cells incubated with HA-MOFs upon 650 nm laser irradiation. Scale bar is 100  $\mu\text{m}$ .

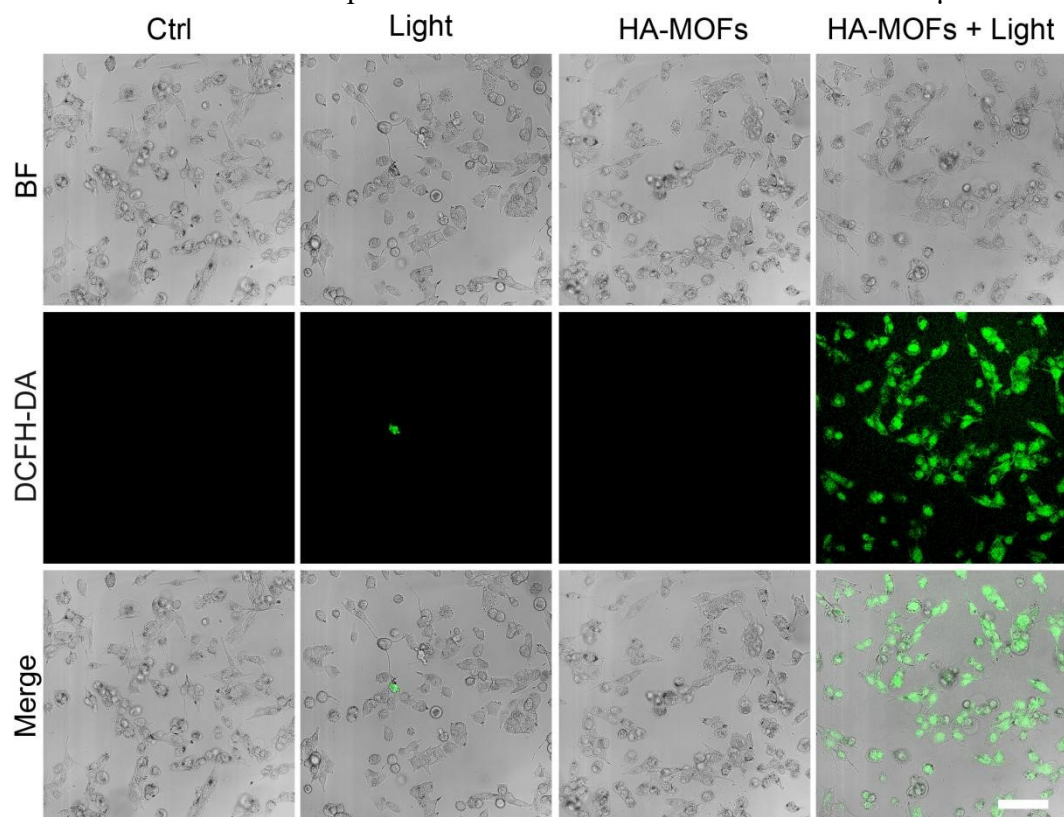

**Figure S16.** Cellular images of light-induced ROS generation in H1975 cells incubated with HA-MOFs upon 650 nm laser irradiation. Scale bar is 100  $\mu\text{m}$ .

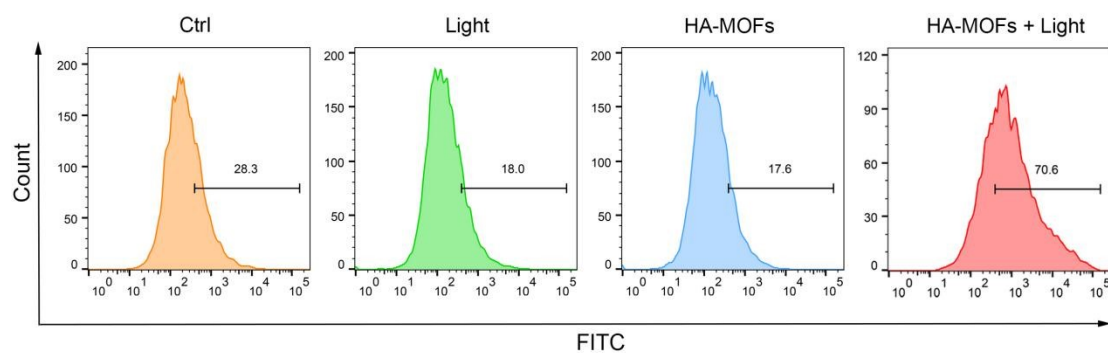

**Figure S17.** Flow cytometry analysis of light-induced ROS generation in H1975 cells incubated with HA-MOFs upon 650 nm laser irradiation.

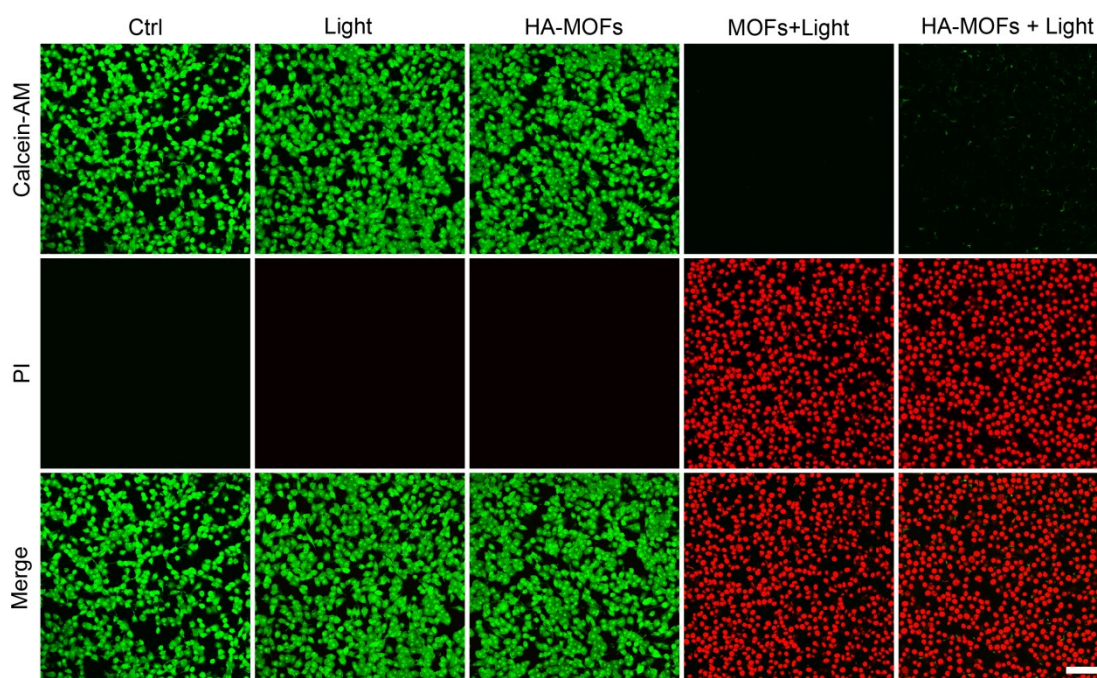

**Figure S18.** Calcein-AM/PI (live/dead) co-stained B16F10 cells incubated with various formulation. Scale bar is 100  $\mu$ m.

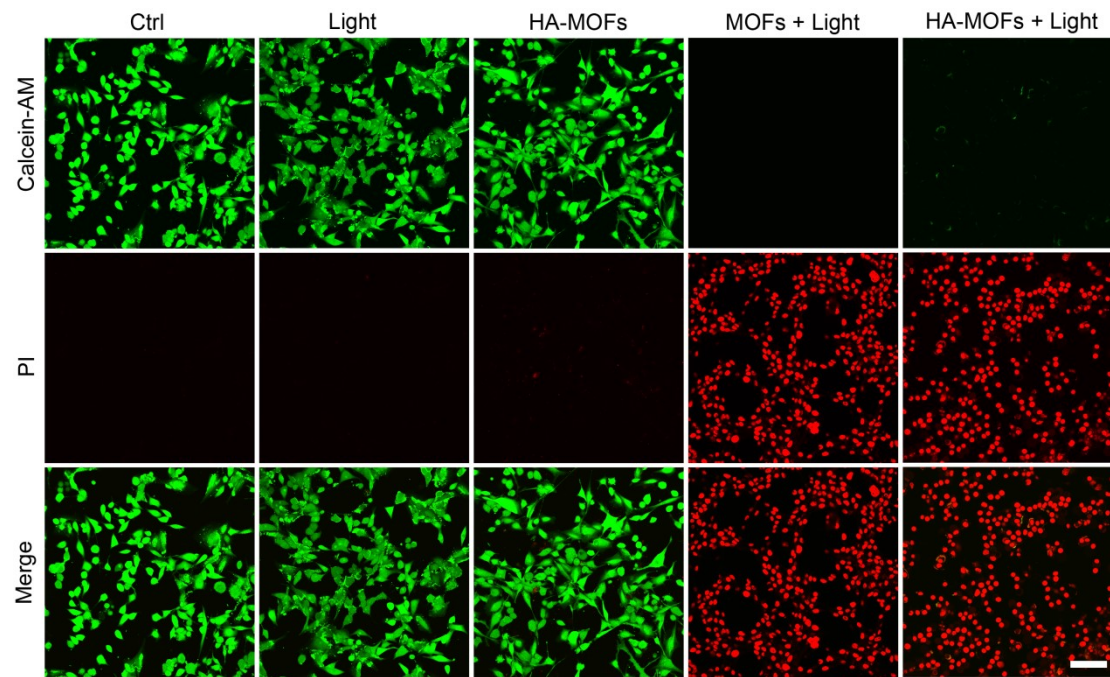

**Figure S19.** Calcein-AM/PI (live/dead) co-stained H1975 cells incubated with various formulation. Scale bar is 100  $\mu\text{m}$ .

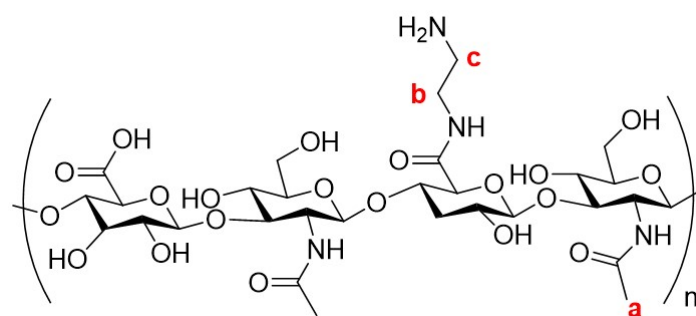

(1)

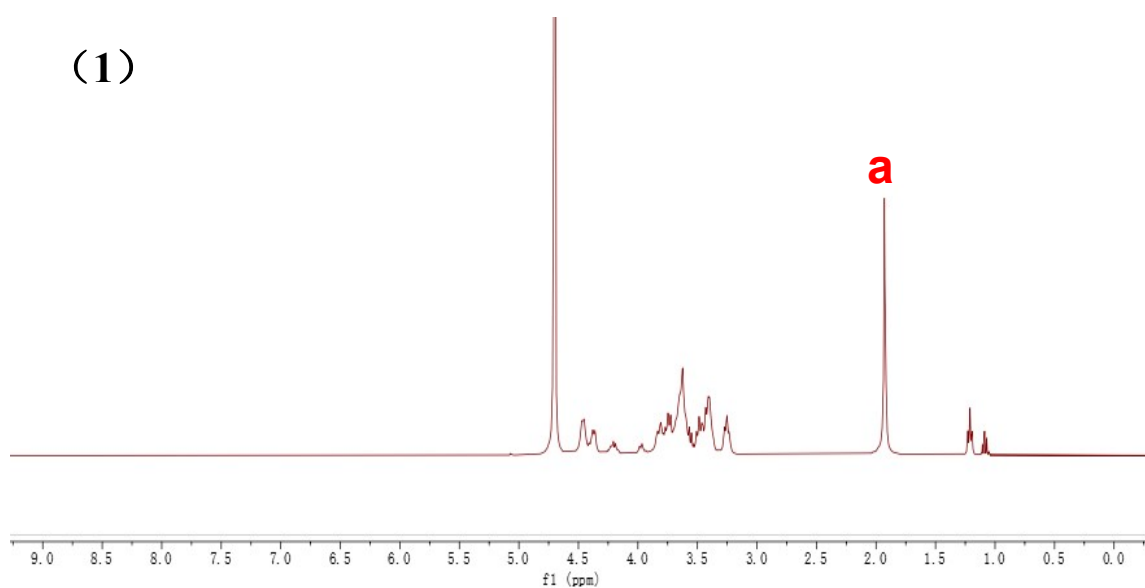

(2)

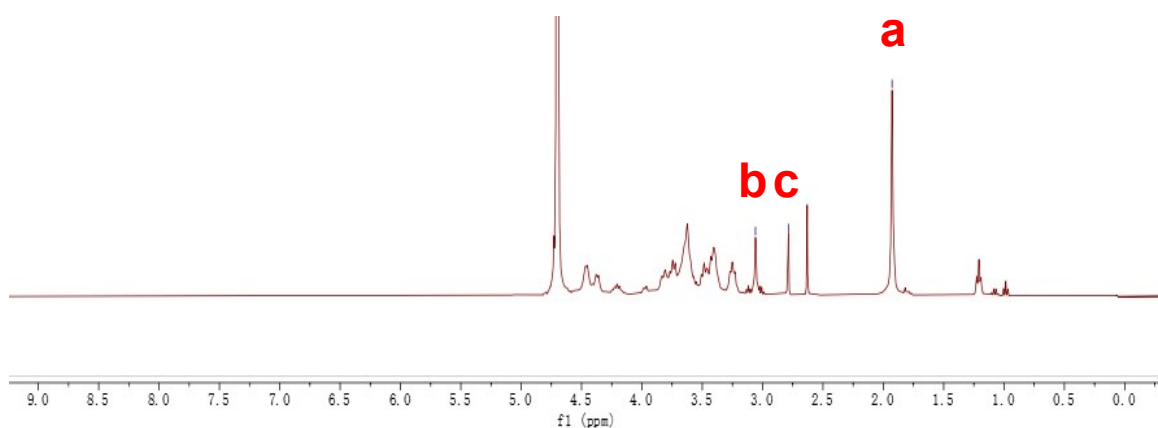

**Figure S20.**  $^1\text{H}$ -NMR spectra of (1) HA and (2) amino-modified HA.

(a: represent Methyl on acetyl group. b and c: represent methylene on ethylenediamine groups)



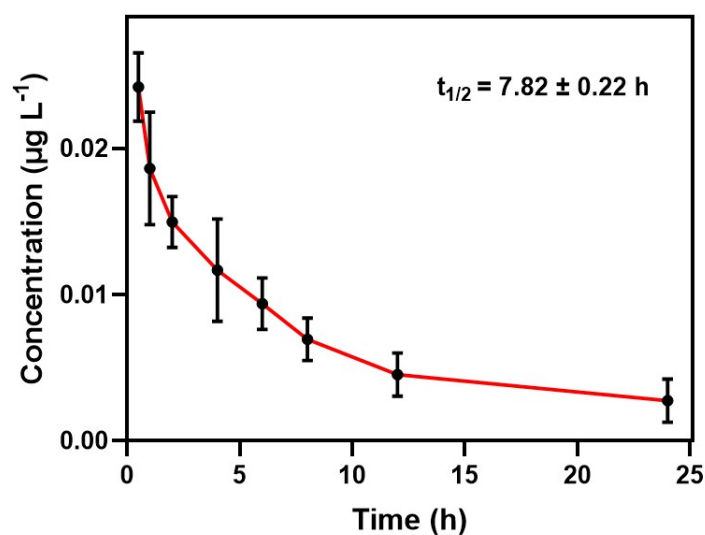

**Figure S21.** Pharmacokinetic profile of HA-MOFs in blood after subcutaneous injection.

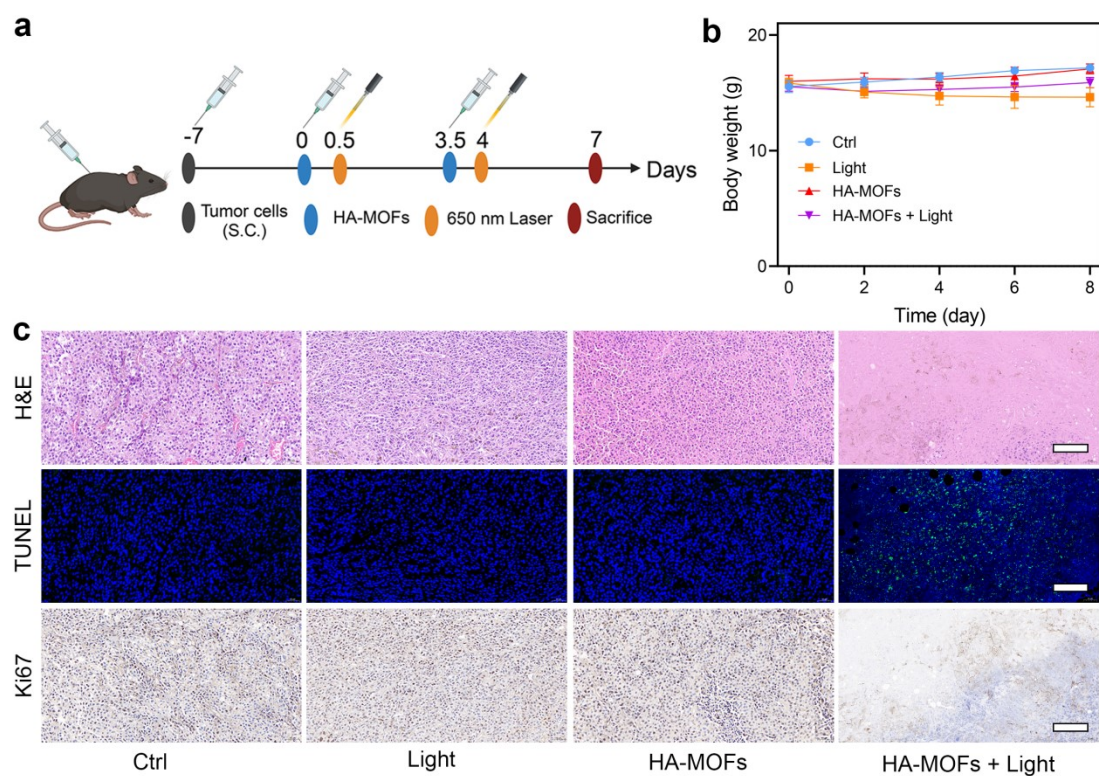

**Figure S22.** (a) Schematic illustration of PDT therapy in B16F10 tumor-bearing mice. (b) Body weight curves of mice during therapeutic period. (c) H&E, TUNEL and Ki67 staining of tumor slices from different experimental groups. Scale bars are 100 µm.



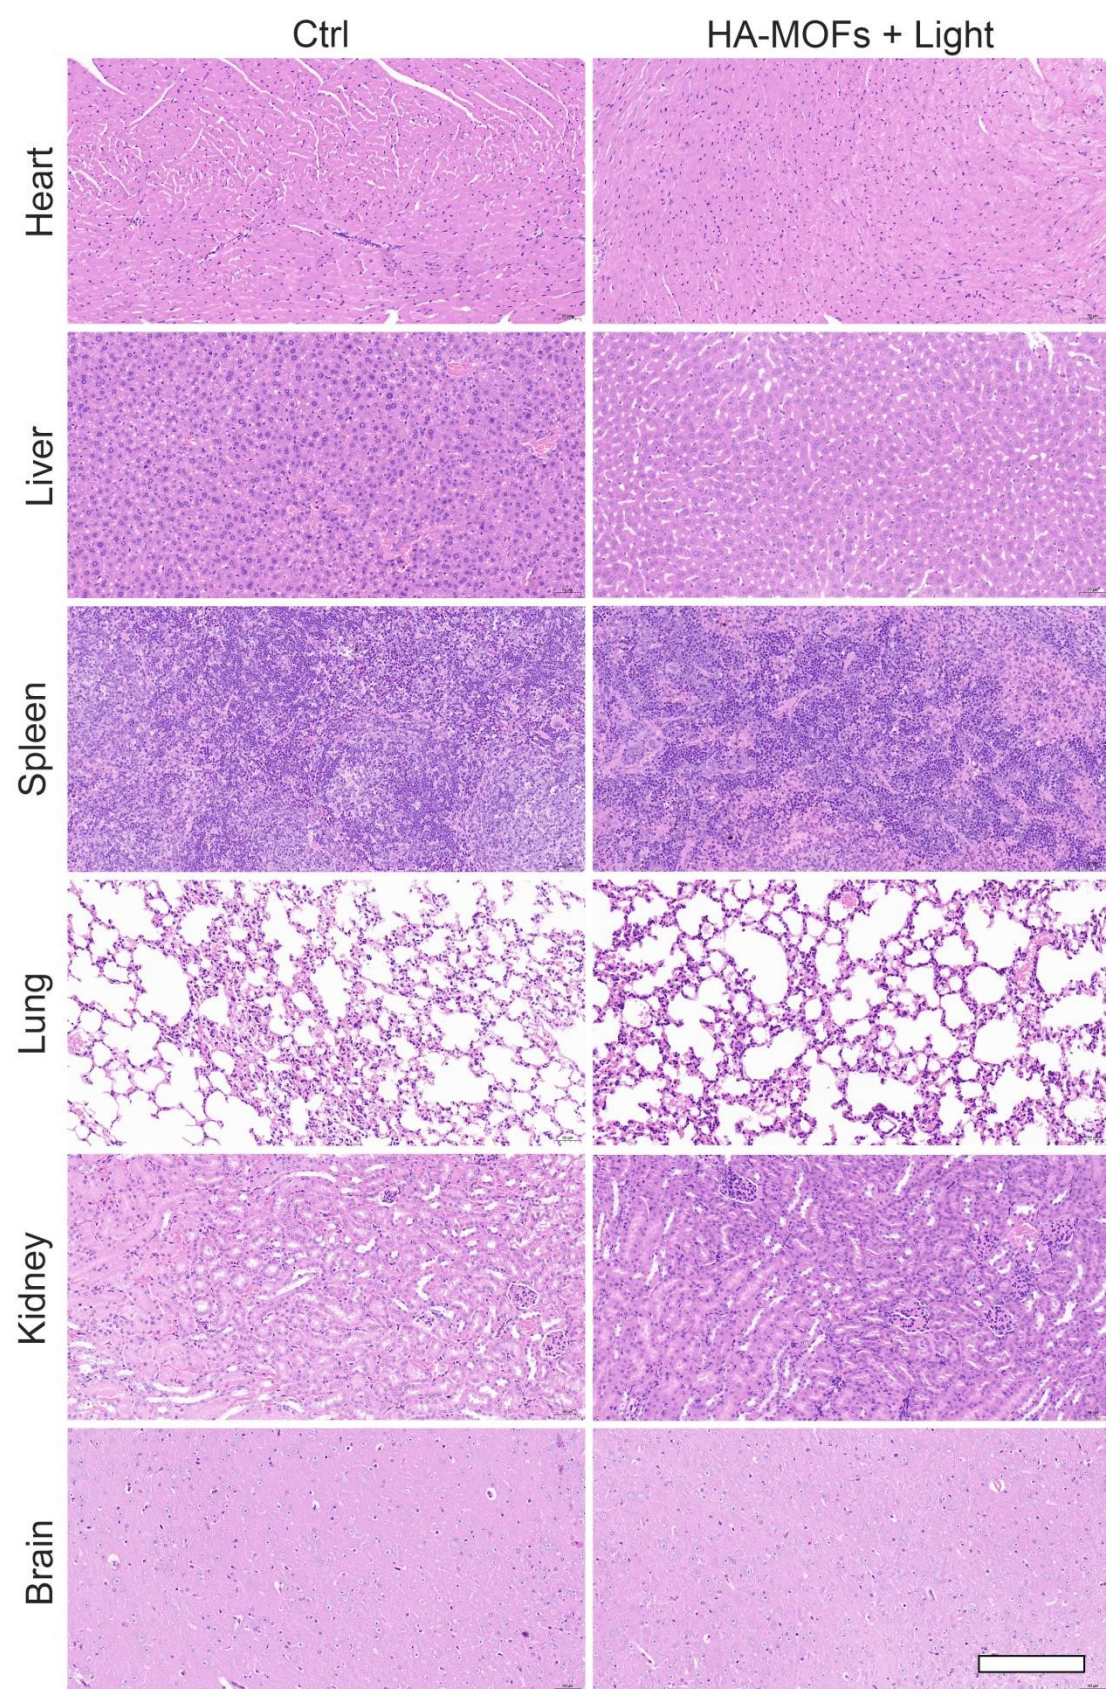

**Figure S23.** H&E staining images of major organs in B16F10 tumor-bearing mice after different treatments. Scale bars are 200  $\mu\text{m}$ .

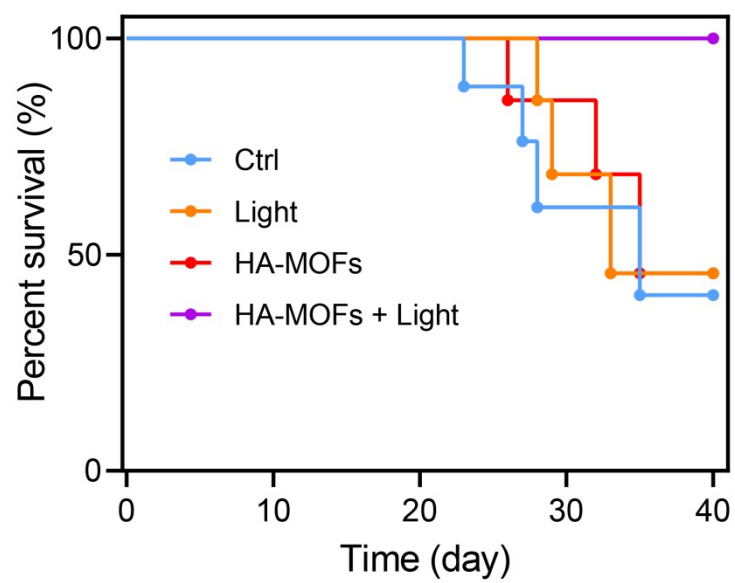

**Figure S24.** Survival curves of B16F10 tumor-bearing mice after different treatments.



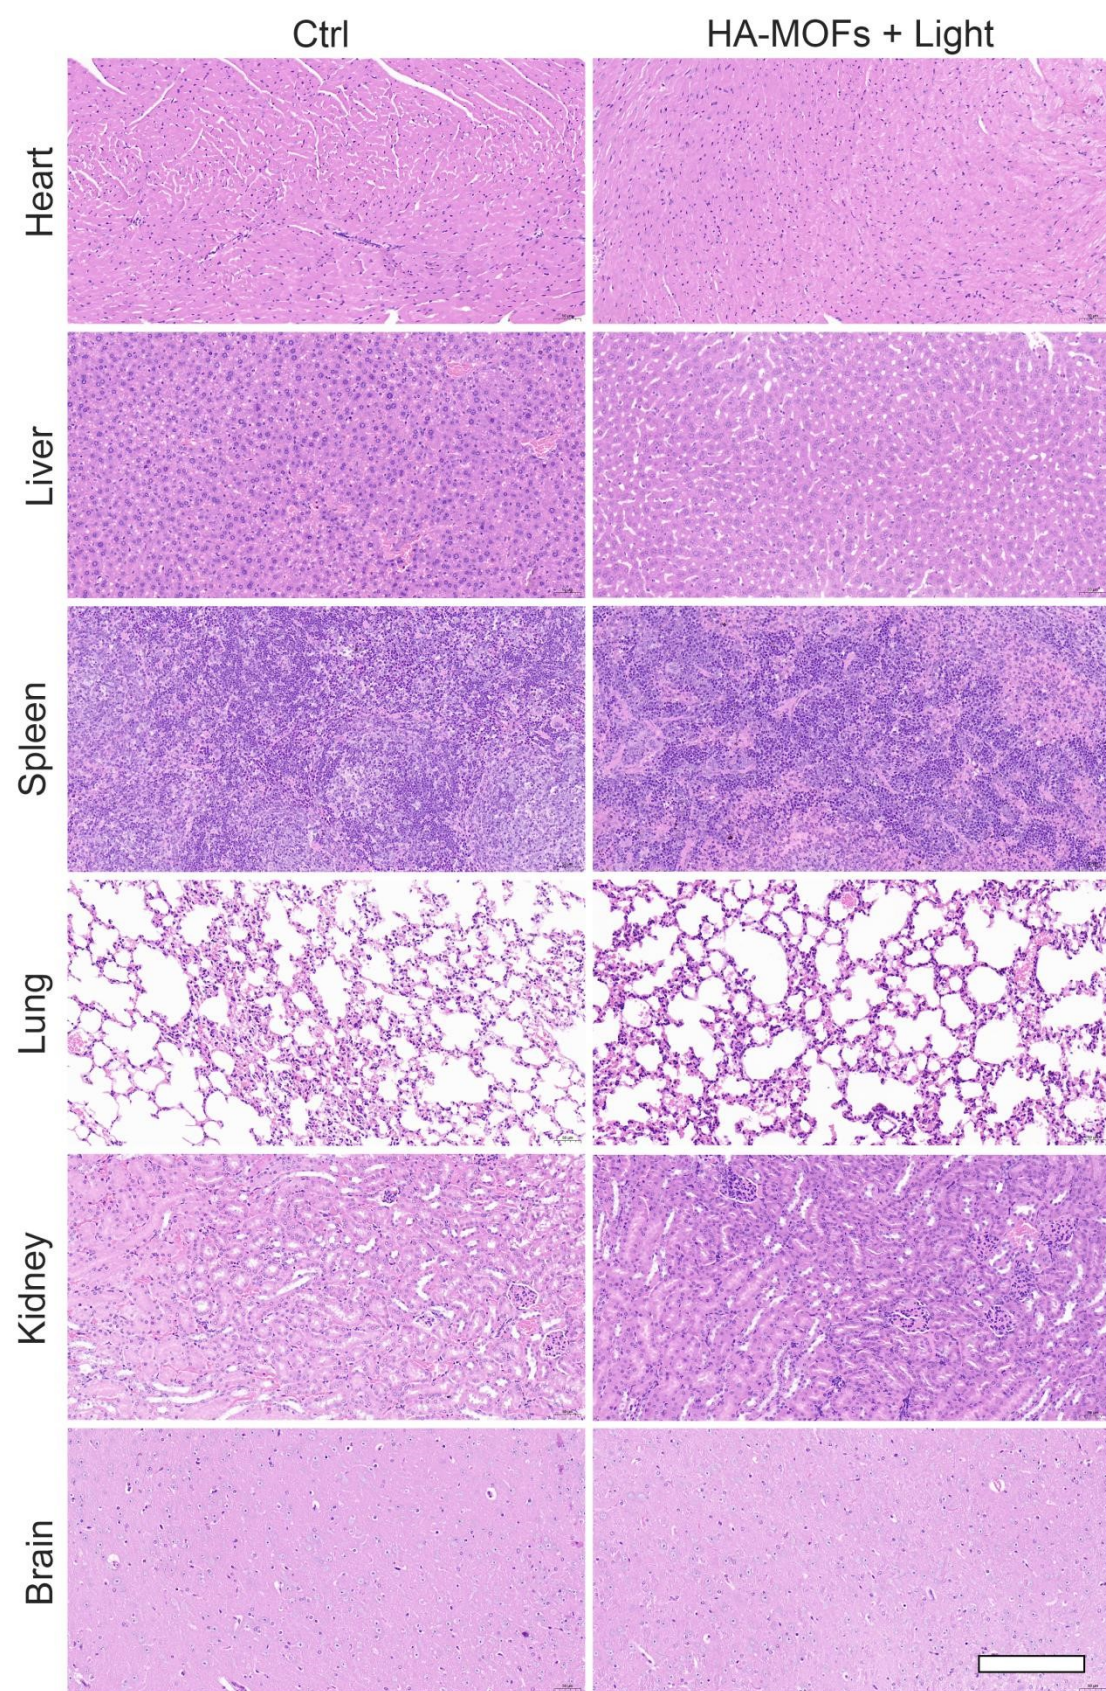

**Figure S25.** H&E staining images of major organs in H1975 tumor-bearing mice after different treatments. Scale bars are 200  $\mu$ m.
